# Supplementary material
Source: publisher site journal article supplement (https://www.dovepress.com/article/505926)
Supplement: Supplementary file 1 [file get_supplementary_file.php]

Supplementary Material

**Supplement Table 1** Functional and dysfunctional questions according to the Kano model

| **Aspects** | **Functional questions** | **Dysfunctional questions** |
| --- | --- | --- |
| 1. tangibility | 1. What would you say if the online platform for telecare services met the needs of users and is easy to operate? | 1. What would you say if the online platform for telecare services did not meet the needs of users and is easy to operate? |
| 2. What would you say if the online platform for telecare services provided specifics on service programs and nurse qualifications? | 2. What would you say if the online platform for telecare services did not provide specifics on service programs and nurse qualifications? |
| 3. What would you say if the online platform for telecare services offered a wide range of services and met real needs? | 3. What would you say if the online platform for telecare services did not offer a wide range of services and met real needs? |
| 4. What would you say if the nurses providing the service were uniformed in their work permits and uniforms? | 4. What would you say if the nurses providing the service were not uniformed in their work permits and uniforms? |
| 5. What would you say if the nurse providing the service carried her supplies in a complete and organized manner? | 5. What would you say if the nurse providing the service did not ca her supplies in a complete and organized manner? |
| 2. reliability | 6. What would you say if an informed consent or protocol was signed prior to telecare? | 6. What would you say if an informed consent or protocol was not signed prior to telecare? |
| 7. What would you say if the nurse providing the service was qualified and matched the description of the appointment on the platform? | 7. What would you say if the nurse providing the service was not qualified and matched the description of the appointment on the platform? |
| 8. What would you say if the nurse providing the service could organize the space to meet the operational requirements based on the specifics of the home? | 8. What would you say if the nurse providing the service could not organize the space to meet the operational requirements based on the specifics of the home? |
| 9. What would you say if the nurse providing the service followed the service protocol and ensured that the process was complete? | 9. What would you say if the nurse providing the service fails to follow the service protocol and ensure that the process was complete? |
| 10. What would you say if the nurse providing the service was conscientious about implementing hand hygiene? | 10. What would you say if the nurse providing the service was not conscientious about implementing hand hygiene? |
| 11. What would you say if maternity information was secure? | 11. What would you say if maternity information was not secure? |
| 3.responsiveness | 12. What would you say if the service organization and the service nurse responded to the order in a timely manner and proactively confirmed the order? | 12. What would you say if the service organization and service nurses were unable to respond to an order in a timely manner and proactively confirm the order? |
| 13. What would you say if the service nurse contacted you in advance to check on the situation and visited on time? | 13. What would you say if the service nurse did not contact you in advance to check on the situation and visit on time? |

**Supplement Table 1** (Continued).

| **Aspects** | **Functional questions** | **Dysfunctional questions** |
| --- | --- | --- |
| 4. assurance | 14. What would you say if the nurse providing the service had a good work ethic and communication skills? | 14. What would you say if the nurse providing the service did not have a good work ethic and communication skills? |
| 15. What would you say if the nurse providing the service had the theoretical expertise and skillful operational skills to solve the problem effectively? | 15. What would you say if the nurse providing the service did not have the theoretical expertise and skillful operational skills to solve the problem effectively? |
| 16. What would you say if the nurse providing the service completed the order as agreed with satisfactory results? | 16. What would you say if the nurse providing the service did not complete the order as agreed with satisfactory results? |
| 17. What would you say if you were able to contact the platform or organization to resolve any problems during the service? | 17. What would you say if you were unable to contact the platform or organization to resolve any problems during the service? |
| 18. What would you say if the service nurses were able to provide guidance on maternal and newborn issues? | 18. What would you say if the service nurses were unable to provide guidance on maternal and newborn issues? |
| 19. What would you say if you were able to rate the service nurse after the service? | 19. What would you say if you were unable to rate the service nurse after the service? |
| 5. empathy | 20. What would you say if service nurses prioritized the needs and wishes of maternity and families from their perspective? | 20. What would you say if service nurses did not prioritize the needs and wishes of maternity and families from their perspective? |
| 21. What would you say if nurses cared for mothers and newborns during the service and proactively learnt about the psychological state of mothers? | 21. What would you say if nurses did not care for mothers and newborns during the service and proactively learn about the psychological state of mothers? |
| 6. economy | 22. What would you say if the services were priced reasonably and within an acceptable range? | 22. What would you say if the services were not priced reasonably and within an acceptable range? |
| 23. What would you say if packages or discounts were available when booking multiple items? | 23. What would you say if packages or discounts were not available when booking multiple items? |
| 24. What would you say if the cost of the service was available to be paid (or partially paid) by Medicare? | 24. What would you say if the cost of the service was not available to be paid (or partially paid) by Medicare? |
